# Supplementary material
Source: PubMed Central journal article supplement (PMC5837310)
Supplement: awx369_brain-2017-01117-file008.pdf [file awx369_brain-2017-01117-file008.pdf]

**Supplemental table 2: SCO2 variants-phenotypes**

| allele 1 | allele 2          | phenotype                                                                          | additional condition(s)                                                                                                                                                                                    | CNS features                                                          | PNS features                                                                                | death (age) | publication                                       |
|----------|-------------------|------------------------------------------------------------------------------------|------------------------------------------------------------------------------------------------------------------------------------------------------------------------------------------------------------|-----------------------------------------------------------------------|---------------------------------------------------------------------------------------------|-------------|---------------------------------------------------|
| E140K    | R6Qfs             | Cardioencephalomyopathy, fatal infantile, due to cytochrome c oxidase deficiency 1 |                                                                                                                                                                                                            |                                                                       |                                                                                             | 3 mo        | Kairit et al                                      |
| E140K    | W36X              | Cardioencephalomyopathy, fatal infantile, due to cytochrome c oxidase deficiency 1 |                                                                                                                                                                                                            |                                                                       |                                                                                             | < 1 mo      | Verdijk et al                                     |
| E140K    | Q53X              | Cardioencephalomyopathy, fatal infantile, due to cytochrome c oxidase deficiency 1 | Lactic acidosis                                                                                                                                                                                            | Gliosis, atrophic brain                                               |                                                                                             | 2 mo        | Papadopoulou et al                                |
| E140K    | R90X              | Cardioencephalomyopathy, fatal infantile, due to cytochrome c oxidase deficiency 1 | Severe metabolic acidosis                                                                                                                                                                                  |                                                                       |                                                                                             | 0.5-1 mo    | Jacksch et al                                     |
| E140K    | C133Y             | Spinal muscular atrophy type I                                                     | Cardiomyopathy, hypotonia, persistent lactic acidosis , respiratory distress                                                                                                                               |                                                                       |                                                                                             | 1 mo        | Tarnopolsky et al                                 |
| E140K    | E140K             | Cardioencephalomyopathy, fatal infantile, due to cytochrome c oxidase deficiency 1 | Stridor and respiratory insufficiency, ptosis, strabismus                                                                                                                                                  | Spasticity and psychomotor retardation                                | Axonal degeneration and demyelination                                                       | ~10 mo      | Pronicki et al<br>Versela et al<br>Jaksch M et al |
| E140K    | L151P             | Cardioencephalomyopathy, fatal infantile, due to cytochrome c oxidase deficiency 1 |                                                                                                                                                                                                            |                                                                       |                                                                                             | birth       | Sacconi et al                                     |
| E140K    | V160G             | Cardioencephalomyopathy, fatal infantile, due to cytochrome c oxidase deficiency 1 | Severe neutropenia                                                                                                                                                                                         | Seizures                                                              |                                                                                             | 4 mo        | Knuf et al                                        |
| E140K    | R171TrP           | Cardioencephalomyopathy, fatal infantile, due to cytochrome c oxidase deficiency 1 | Respiratory insufficiency, enlarged liver, edema                                                                                                                                                           | Brain edema                                                           |                                                                                             | 4 mo        | Jacksch et al                                     |
| E140K    | M177T             | Cardioencephalomyopathy, fatal infantile, due to cytochrome c oxidase deficiency 1 | Ptosis, strabismus                                                                                                                                                                                         | Spasticity, psychomotor retardation                                   |                                                                                             | 4 yo        | Pronicki et al                                    |
| G193S    | G193S             | Cardioencephalomyopathy, fatal infantile, due to cytochrome c oxidase deficiency 1 | Hepatomegaly, metabolic acidosis, respiratory insufficiency, decreased tone and muscle bulk, wrist flexion, decreased grasp strength, weak suck reflex, significant head lag, dystonic arching of the back |                                                                       |                                                                                             | 1 mo        | Mobley et al                                      |
| E140K    | 10-BP DUP, NT1302 | Spinal muscular atrophy                                                            | Resembled Werdnig-Hoffmann disease                                                                                                                                                                         | Denervation due to loss of the anterior horn cells of the spinal cord |                                                                                             | 1.5 mo      | Salviati et al                                    |
| V160A    | P233T             | Fatal infantile hyperthermia                                                       |                                                                                                                                                                                                            |                                                                       |                                                                                             | 5-10 mo     | Sambuughin et al                                  |
| E140K    | S225F             | Cardioencephalomyopathy, fatal infantile, due to cytochrome c oxidase deficiency 1 |                                                                                                                                                                                                            | Brain atrophy                                                         | Nerve conduction studies revealed a mixed axonal and demyelinating sensory motor neuropathy | 6 mo        | Papadopoulou et al                                |
| E140K    | P169T             | Charcot-Marie-Tooth disease                                                        | Ptosis and strabismus                                                                                                                                                                                      |                                                                       | Motor predominant polyneuropathy                                                            | alive (5)   |                                                   |
| D135G    | R171Q             | Charcot-Marie-Tooth disease                                                        |                                                                                                                                                                                                            |                                                                       | Motor and sensory polyneuropathy                                                            | alive (22)  |                                                   |
